# Supplementary material
Source: publisher figshare collection journal article supplement (https://asha.figshare.com/ndownloader/files/31412374)
Supplement: Supplementary file 1 [file 31412374]

## Survey Results

### Section 1: Pre-Testing

Q1. Prior to conducting (C)APD testing, do you obtain or require basic audiometric evaluation results?

|                                        | %    | n   |
|----------------------------------------|------|-----|
| Yes                                    | 98.5 | 192 |
| No                                     | 1.5  | 3   |
| <i>Total number of respondents=195</i> |      |     |

Q2. If yes, what testing do you conduct or require? Please check all that apply.

|                                        | %    | n   |
|----------------------------------------|------|-----|
| Pure Tone Evaluation                   | 100  | 192 |
| Tympanometry                           | 96.9 | 186 |
| Speech Recognition Thresholds          | 91.7 | 176 |
| Word Recognition Scores (In Quiet)     | 90.1 | 173 |
| Acoustic Reflex Thresholds             | 69.3 | 133 |
| Otoacoustic Emissions                  | 57.8 | 111 |
| Word Recognition Scores (In Noise)     | 53.6 | 103 |
| Acoustic Reflex Decay                  | 14.1 | 27  |
| Performance Intensity Testing          | 2.1  | 4   |
| Otoscopy                               | 0.5  | 1   |
| Other                                  | 3.6  | 7   |
| <i>Total number of respondents=192</i> |      |     |

Q3a. Prior to conducting a (C)APD evaluation, do you provide questionnaires to the patient?

|                                        | %    | n   |
|----------------------------------------|------|-----|
| Yes                                    | 29.4 | 50  |
| No                                     | 70.6 | 120 |
| <i>Total number of respondents=170</i> |      |     |

Q3b. Prior to conducting a (C)APD evaluation, do you provide questionnaires to the parent?

|                                        | %    | n   |
|----------------------------------------|------|-----|
| Yes                                    | 75.1 | 145 |
| No                                     | 24.9 | 48  |
| <i>Total number of respondents=193</i> |      |     |

Q3c. Prior to conducting a (C)APD evaluation, do you provide questionnaires to the teacher?

|                                        | %    | n   |
|----------------------------------------|------|-----|
| Yes                                    | 65.3 | 124 |
| No                                     | 34.7 | 66  |
| <i>Total number of respondents=190</i> |      |     |

Q4. Which questionnaires do you utilize? Please check all that apply.

|                                                                | %    | n   |
|----------------------------------------------------------------|------|-----|
| Fisher's Auditory Problems Checklist                           | 62.5 | 100 |
| Children's Auditory Performance Scale                          | 51.3 | 82  |
| Screening Instrument for Targeting Educational Risk            | 38.8 | 62  |
| Pre-School Screening Instrument for Targeting Educational Risk | 16.9 | 27  |
| Listening Inventory for Education                              | 15.0 | 24  |
| Children's Home Inventory for Listening Difficulties           | 5.0  | 8   |
| Behavior Rating Inventory for Executive Function               | 0.6  | 1   |
| Other                                                          | 30.6 | 49  |
| <i>Total number of respondents=160</i>                         |      |     |

Q5. What other evaluations from other disciplines do you prefer or require prior to diagnosis? Please check all that apply.

|                           | Prefer                           |     | Require |    | n   |
|---------------------------|----------------------------------|-----|---------|----|-----|
|                           | %                                | n   | %       | n  |     |
| Psychology                | 63.7                             | 107 | 36.3    | 61 | 168 |
| Educational               | 62.6                             | 102 | 37.4    | 61 | 163 |
| Speech-Language Pathology | 46.0                             | 81  | 54.0    | 95 | 176 |
| Otolaryngology            | 88.0                             | 44  | 12.0    | 6  | 50  |
| Neurology                 | 93.4                             | 57  | 6.6     | 4  | 61  |
| Other                     | Prefer vs. Require Not Specified |     |         |    | 21  |

Q6. Do you conduct a case history prior to testing?

|                                        | %    | n   |
|----------------------------------------|------|-----|
| Yes                                    | 94.8 | 183 |
| No                                     | 5.2  | 10  |
| <i>Total number of respondents=193</i> |      |     |

Q7. If yes, what type of case history form do you use?

|                           | %    | n   |
|---------------------------|------|-----|
| Formal Site-Specific Case | 60.1 | 110 |

|                                        |      |     |
|----------------------------------------|------|-----|
| History                                |      |     |
| Informal Discussion Case               | 58.5 | 107 |
| History                                |      |     |
| Formal Published Case                  | 4.9  | 9   |
| History                                |      |     |
| Educational Team                       | 2.2  | 4   |
| (No case history conducted)            |      |     |
| Individualized Education               | 1.6  | 3   |
| Plan                                   |      |     |
| (No case history conducted)            |      |     |
| Original Referral Source               | 1.6  | 3   |
| (No case history conducted)            |      |     |
| <i>Total number of respondents=183</i> |      |     |

## Section 2: Screening

Q8. Do you screen for (C)APD?

|                                        |      |     |
|----------------------------------------|------|-----|
|                                        | %    | n   |
| Yes                                    | 52.1 | 100 |
| No                                     | 47.9 | 92  |
| <i>Total number of respondents=192</i> |      |     |

Q9. If yes, what screening methods do you use?

|                                        |      |    |
|----------------------------------------|------|----|
|                                        | %    | n  |
| SCAN A/C                               | 69.0 | 69 |
| Checklists/Questionnaires              | 56.0 | 56 |
| Classroom Observation                  | 33.0 | 33 |
| Dichotic Digits Test                   | 11.0 | 11 |
| Random Gap Detection                   | 5.0  | 5  |
| Test                                   |      |    |
| Other (please specify)                 | 25.0 | 25 |
| <i>Total number of respondents=100</i> |      |    |

Q9. Other(please specify) responses.

|                                       |      |   |
|---------------------------------------|------|---|
|                                       | %    | n |
| Speech In Noise Testing               | 36.0 | 9 |
| Evaluation by Speech-                 | 12.0 | 3 |
| Language Pathologist                  |      |   |
| Auditory Continuous                   | 4.0  | 1 |
| Performance Test                      |      |   |
| Staggered Spondaic Words              | 4.0  | 1 |
| Test                                  |      |   |
| Phonemic Synthesis Test               | 4.0  | 1 |
| Parent Interview                      | 4.0  | 1 |
| Informal Screening                    | 4.0  | 1 |
| <i>Total number of respondents=25</i> |      |   |

### Section 3: Test Battery

Q10. When conducting a (C)APD evaluation, do you use a test battery?

|                                        | %    | n   |
|----------------------------------------|------|-----|
| Yes                                    | 96.8 | 181 |
| No                                     | 3.2  | 6   |
| <i>Total number of respondents=187</i> |      |     |

Q11. If you use a test battery, how often is your battery a:

|                                                                                                                               | Always |    | Often |    | Sometimes |    | Never |    | Total n |
|-------------------------------------------------------------------------------------------------------------------------------|--------|----|-------|----|-----------|----|-------|----|---------|
|                                                                                                                               | %      | n  | %     | n  | %         | n  | %     | n  |         |
| Pre-set (C)APD battery for <b><i>all</i></b> patients regardless of age or case history.                                      | 17.4   | 23 | 21.2  | 28 | 13.6      | 18 | 47.7  | 63 | 132     |
| Pre-set (C)APD <b><i>battery for each specific age</i></b> range (e.g., all 10-year old children) regardless of case history. | 9.5    | 11 | 19.0  | 22 | 25.0      | 29 | 46.6  | 54 | 116     |
| A set minimum battery for all patients with additions based on <b><i>individual case history and age.</i></b>                 | 52.9   | 82 | 27.1  | 42 | 11.6      | 18 | 8.4   | 13 | 155     |
| A set minimum battery for all patients with additions based <b><i>just on individual case history.</i></b>                    | 12.7   | 14 | 21.8  | 24 | 28.2      | 31 | 37.3  | 41 | 110     |
| Battery <b><i>completely based on case history</i></b> considerations.                                                        | 9.6    | 11 | 14.0  | 16 | 21.1      | 24 | 55.3  | 63 | 114     |

Q12. If you use a pre-set, or pre-determined battery for some or all of your patients, how did you select this test battery?

|                                         | %    | n  |
|-----------------------------------------|------|----|
| Clinical Experience                     | 56.5 | 95 |
| Review of Literature                    | 44.6 | 75 |
| ASHA Technical Reports from 1996 & 2005 | 40.0 | 67 |
| Attendance at a Seminar or Workshop     | 36.3 | 61 |
| Clinical Site                           | 31.0 | 52 |
| Bruton Conference                       | 25.6 | 43 |

|                                        |     |   |
|----------------------------------------|-----|---|
| Documents of 2000                      |     |   |
| Buffalo Model                          | 4.8 | 8 |
| State Technical Assistance             | 0.6 | 1 |
| Papers                                 |     |   |
| Information from a                     | 0.6 | 1 |
| Working Group which                    |     |   |
| evaluates (C)APD                       |     |   |
| Consultation with other                | 0.6 | 1 |
| Audiologists                           |     |   |
| Education                              | 0.6 | 1 |
| Recommendations from                   | 0.6 | 1 |
| Professional Mentor                    |     |   |
| <i>Total number of respondents=168</i> |     |   |

Q13. When conducting a (C)APD evaluation, on average, how many tests do you utilize?

|                                        | %    | n   |
|----------------------------------------|------|-----|
| 1-3 Tests                              | 14.5 | 27  |
| 4-6 Tests                              | 58.1 | 108 |
| 6-9 Tests                              | 27.9 | 52  |
| 10 or More                             | 4.8  | 9   |
| <i>Total number of respondents=186</i> |      |     |

#### Section 4: Specific Tests

Q14. When conducting (C)APD testing, which of the following tests do you include in your protocol?

See Table 2 for results summary

Q15. Is your ability to diagnose (C)APD limited by:

|                                       | %    | n  |
|---------------------------------------|------|----|
| Time                                  | 10.3 | 7  |
| Test Availability                     | 8.8  | 6  |
| Lack of Available Normative Data      | 1.5  | 1  |
| Funding for Equipment                 | 1.5  | 1  |
| Lack of Staff                         | 1.5  | 1  |
| Limitations by School Regulations     | 41.2 | 28 |
| Reimbursement                         | 36.8 | 25 |
| Limited by State Law                  | 7.4  | 5  |
| Other                                 | 32.4 | 22 |
| <i>Total number of respondents=68</i> |      |    |

## Section 5: Management

Q16. If you diagnose (C)APD how often do you use the following:

|                                                                                                                                | Always |    | Often |    | Sometimes |    | Never |    | Total n |
|--------------------------------------------------------------------------------------------------------------------------------|--------|----|-------|----|-----------|----|-------|----|---------|
|                                                                                                                                | %      | n  | %     | n  | %         | n  | %     | n  |         |
| A published list of management recommendations.                                                                                | 10.0   | 13 | 26.2  | 34 | 21.5      | 28 | 42.3  | 55 | 130     |
| A pre-printed list of management recommendations generated by clinical site.                                                   | 19.7   | 27 | 23.4  | 32 | 19.7      | 27 | 37.2  | 51 | 137     |
| A pre-printed list of management recommendations based on diagnostic profile or category (i.e., temporal integration deficits) | 19.5   | 29 | 37.6  | 56 | 14.8      | 22 | 28.2  | 42 | 149     |
| A customized list of management recommendations based on findings of diagnostic tests (not using a profile diagnosis system).  | 50.9   | 84 | 24.2  | 40 | 14.5      | 24 | 10.3  | 17 | 165     |

Q17. In your opinion, who is qualified to make a diagnosis of (C)APD?

|                                        | %    | n   |
|----------------------------------------|------|-----|
| Audiologist                            | 96.8 | 184 |
| Speech-Language Pathologist            | 15.8 | 30  |
| Psychologist                           | 6.8  | 13  |
| Educators                              | 4.7  | 9   |
| Otolaryngologists                      | 2.6  | 5   |
| Other                                  | 7.9  | 15  |
| <i>Total number of respondents=190</i> |      |     |

Q18. If a patient is diagnosed with (C)APD, in your opinion, whose responsibility is it to recommend a treatment plan/management strategies?

|                                        | %    | n   |
|----------------------------------------|------|-----|
| Audiologist                            | 80.9 | 152 |
| Speech-Language Pathologist            | 40.4 | 76  |
| Multidisciplinary Education Team       | 36.2 | 68  |
| Education Professional                 | 13.8 | 26  |
| Primary Classroom Teachers             | 7.4  | 14  |
| <i>Total number of respondents=188</i> |      |     |

Q19. If a patient is diagnosed with (C)APD, in your opinion, whose responsibility is it to provide a treatment plan/management strategies?

|                                        | %    | n   |
|----------------------------------------|------|-----|
| Audiologist                            | 39.5 | 73  |
| Speech-Language Pathologist            | 73.5 | 136 |
| Multidisciplinary Education Team       | 38.9 | 72  |
| Education Professional                 | 52.4 | 97  |
| Primary Classroom Teachers             | 40.0 | 74  |
| <i>Total number of respondents=185</i> |      |     |

Q20a. If you provide recommendations for treatment for (C)APD, which of the following do you recommend? (Check all that apply). Environmental Modifications response column.

|                                            | %    | n   |
|--------------------------------------------|------|-----|
| Preferential Seating                       | 94.7 | 177 |
| Gain Student's Attention Prior to Speaking | 91.4 | 171 |
| Repeating or Rephrasing Information        | 88.8 | 166 |
| Personal FM Systems                        | 85.0 | 159 |
| Pre-Teaching New Concepts or Vocabulary    | 83.4 | 156 |
| Sound Field FM Systems                     | 71.7 | 134 |
| Modifying Classroom Activities             | 71.7 | 134 |
| Use of a Note-Taker                        | 69.5 | 130 |
| Other (please specify)                     | 21.9 | 41  |
| <i>Total number of respondents=187</i>     |      |     |

Q20a. Other (please specify) comments.

|                                                                      | %    | n  |
|----------------------------------------------------------------------|------|----|
| Individual Basis of Test Performance, Classroom Observation, and Age | 46.3 | 19 |
| Acoustic Modifications of Student's Classroom                        | 26.8 | 11 |
| Visual Aids                                                          | 7.3  | 3  |
| Written Instructions                                                 | 7.3  | 3  |
| Checking Comprehension                                               | 4.9  | 2  |
| Tutoring                                                             | 4.9  | 2  |
| Text on Tape                                                         | 2.4  | 1  |
| Extra Time                                                           | 2.4  | 1  |
| Changing Teaching Style                                              | 2.4  | 1  |
| Chunking                                                             | 2.4  | 1  |
| <i>Total number of respondents who selected "other" for Q20a =41</i> |      |    |

Q20b. If you provide recommendations for treatment for (C)APD, which of the following do you recommend? (Check all that apply). Remediation Strategies response column.

|                                                   | %    | n   |
|---------------------------------------------------|------|-----|
| Auditory Closure Activities                       | 70.1 | 122 |
| Earobics                                          | 70.1 | 122 |
| Phoneme Training                                  | 59.8 | 104 |
| Temporal Training                                 | 50.6 | 88  |
| Fast ForWord                                      | 44.3 | 77  |
| Prosody Training                                  | 43.7 | 76  |
| Lindamood-Bell Training Materials                 | 37.4 | 65  |
| Dichotic Interaural Intensity Difference Training | 17.8 | 31  |
| Other (please specify)                            | 20.7 | 36  |
| <i>Total number of respondents=174</i>            |      |     |

Q20b. Other (please specify) comments.

|                                                                        | %    | n |
|------------------------------------------------------------------------|------|---|
| Individualized Strategies based on Test Results and Diagnostic Profile | 22.2 | 8 |
| Speech in Noise Training                                               | 13.9 | 5 |
| Memory Building Activities                                             | 11.1 | 4 |
| Auditory Sequence Conceptualization                                    | 8.3  | 3 |
| Auditory Attention and Organization Activities                         | 8.3  | 3 |
| Interhemispheric Transfer Exercises                                    | 8.3  | 3 |
| Metronome Training                                                     | 5.6  | 2 |
| Music and Coordination Activities                                      | 2.8  | 1 |
| Compass Activities by Lucker                                           | 2.8  | 1 |
| Noise Desensitization                                                  | 2.8  | 1 |
| <i>Total number of respondents who selected "other" for Q20b=36</i>    |      |   |

Q20c. If you provide recommendations for treatment for (C)APD, which of the following do you recommend? (Check all that apply). Compensatory Strategies response column.

|                                     | %    | n   |
|-------------------------------------|------|-----|
| Active Listening Skills Training    | 82.4 | 131 |
| Metamemory Skills                   | 73.0 | 116 |
| Context Derived Vocabulary Building | 51.6 | 82  |



|                                        |      |    |
|----------------------------------------|------|----|
| Assertiveness Training                 | 46.5 | 74 |
| Discourse Cohesion                     | 39.0 | 62 |
| Devices                                |      |    |
| Cognitive Behavior                     | 34.0 | 54 |
| Modification                           |      |    |
| Schema Induction                       | 23.3 | 37 |
| Other (please specify)                 | 9.4  | 15 |
| <i>Total number of respondents=159</i> |      |    |

|                                                                                   |      |   |
|-----------------------------------------------------------------------------------|------|---|
| Q20c. Other (please specify) comments                                             |      |   |
|                                                                                   | %    | n |
| Individualized Strategies based on Test Results and Diagnostic Profile            | 46.7 | 7 |
| Recommendations based on Consultation with Educational Team or Speech Pathologist | 13.3 | 2 |
| Organizational Calendars                                                          | 13.3 | 2 |
| <i>Total number of respondents who selected "other" for Q20c=15</i>               |      |   |

|                                                                                                                                                                                                                                                                                                                                  |      |    |
|----------------------------------------------------------------------------------------------------------------------------------------------------------------------------------------------------------------------------------------------------------------------------------------------------------------------------------|------|----|
| Q21. Is your ability to provide <b>treatment recommendations</b> for (C)APD limited by:                                                                                                                                                                                                                                          |      |    |
|                                                                                                                                                                                                                                                                                                                                  | %    | n  |
| School District Policy or Procedures                                                                                                                                                                                                                                                                                             | 45.5 | 46 |
| Lack of Training                                                                                                                                                                                                                                                                                                                 | 45.5 | 46 |
| Individual School Policy or Procedures                                                                                                                                                                                                                                                                                           | 25.7 | 26 |
| Reimbursement                                                                                                                                                                                                                                                                                                                    | 18.8 | 19 |
| State Law                                                                                                                                                                                                                                                                                                                        | 13.9 | 14 |
| Other (please specify)                                                                                                                                                                                                                                                                                                           | 17.8 | 18 |
| <i>Total number of respondents=129; however, 28 respondents selected "other" and then wrote in "not limited in ability to provide treatment recommendations." (N/A was not an option for this question). Those respondents were omitted from the sample. Percentages were calculated based on the remaining 101 respondents.</i> |      |    |

|                                                                         |            |   |
|-------------------------------------------------------------------------|------------|---|
| Q21. Other(please specify) comments:                                    |            |   |
|                                                                         | %          | n |
| Time                                                                    | 27.8 (5.0) | 5 |
| Lack of Staff                                                           | 11.1 (2.0) | 2 |
| Lack of Materials                                                       | 5.6 (1.0)  | 1 |
| Space                                                                   | 5.6 (1.0)  | 1 |
| Lack of Support from other Professionals                                | 5.6 (1.0)  | 1 |
| Efficacy of Strategies                                                  | 5.6 (1.0)  | 1 |
| <i>Total number of respondents who selected "other" =18. Percentage</i> |            |   |

based on n=18 with n=101 in parentheses. Note that not all respondents who selected "other" provided a comment.

Q22. Is your ability to provide **direct treatment** for (C)APD limited by:

|                                        | %    | n  |
|----------------------------------------|------|----|
| Reimbursement                          | 40.3 | 56 |
| Lack of Training                       | 32.4 | 45 |
| School District Policy or Procedures   | 30.2 | 42 |
| Individual School Policy or Procedures | 12.2 | 17 |
| State Law                              | 9.4  | 13 |
| Other (please specify)                 | 8.6  | 12 |

Total number of respondents=151; however, 12 respondents selected "other" and then wrote in "not limited in ability to provide direct treatment." (N/A was not an option for this question). Those respondents were omitted from the sample. Percentages were calculated based on the remaining 139.

Q22. Other(please specify) comments.

|                                                                         | %           | n  |
|-------------------------------------------------------------------------|-------------|----|
| Time Constraints                                                        | 66.7 (21.6) | 30 |
| Feel Other Professionals are Responsible for Providing Direct Treatment | 24.4 (7.9)  | 11 |
| Lack of Staff                                                           | 6.7 (2.2)   | 3  |
| Lack of State Funding                                                   | 2.2 (0.7)   | 1  |
| Lack of Resources                                                       | 2.2 (0.7)   | 1  |

Total number of respondents who selected "other"=45. Percentage based on n=45 with n=139 in parentheses.

## Section 6: Demographic Information

Q23. What is your gender?

|        | %    | n   |
|--------|------|-----|
| Female | 86.5 | 160 |
| Male   | 13.5 | 25  |

Total number of respondents=185

Q24. What is the highest degree you currently hold?

|                 | %    | n  |
|-----------------|------|----|
| Master's Degree | 48.6 | 90 |
| Doctoral Degree | 51.4 | 95 |

Total number of respondents=185

Q25. In what setting do you currently practice?

|  | % | n |
|--|---|---|
|--|---|---|

|                                        |      |    |
|----------------------------------------|------|----|
| School System                          | 36.4 | 71 |
| Private Practice                       | 15.9 | 31 |
| Hospital                               | 15.4 | 30 |
| University Clinic                      | 13.8 | 27 |
| ENT                                    | 8.2  | 16 |
| Community Clinic                       | 4.1  | 8  |
| Government Facility                    | 1.5  | 3  |
| Cochlear Implant Center                | 1.0  | 2  |
| Non-Profit Clinic                      | 1.0  | 2  |
| Hearing Aid Industry                   | 0.5  | 1  |
| Veteran's Facility                     | 0.5  | 1  |
| Rehabilitation Facility                | 0.5  | 1  |
| University Research                    | 0.5  | 1  |
| Outpatient Clinic                      | 0.5  | 1  |
| <i>Total number of respondents=195</i> |      |    |

Q26. What age groups do you test for (C)APD? (check all that apply)

|                                        | %    | n   |
|----------------------------------------|------|-----|
| Age 3-6                                | 30.3 | 56  |
| Age 7-10                               | 98.4 | 182 |
| Age 11-14                              | 95.7 | 177 |
| Age 14-17                              | 91.9 | 170 |
| Age 18+                                | 63.2 | 117 |
| <i>Total number of respondents=185</i> |      |     |
